# Supplementary material for: Antioxidant, Cytotoxicity, Antimicrobial Activity, and In Silico Analysis of the Methanolic Leaf and Flower Extracts of Clitoria ternatea
Source: Biochem Res Int. 2023 Sep 22;2023:8847876. doi: 10.1155/2023/8847876 (PMC10541305; doi:10.1155/2023/8847876)
Supplement: Supplementary Materials — Table S1. Compounds present in methanolic leaf extract C. ternatea as well as their CID. No. and docking score. Table S2. Compounds present in methanolic flower extract C. ternatea as well as their CID. No. and docking score. [file 8847876.f1.docx]

**Antioxidant, cytotoxicity, antimicrobial activity, and *In silico* analysisof the methanolic leaf and flower extracts of *[Clitoria ternatea](https://en.wikipedia.org/wiki/Clitoria_ternatea)***

**Md. Ariful Islam1,#, Samiran Kumar Mondal1,#, Shirmin Islam1, Most. Nourin Akther Shorna2, Suvro Biswas1, Md. Salah Uddin1, Shahriar Zaman1, Md. Abu Saleh1,***

1Microbiology Laboratory, Department of Genetic Engineering and Biotechnology, University of Rajshahi, Rajshahi- 6205, Bangladesh.

2Department of Botany, University of Rajshahi, Rajshahi-6205, Bangladesh.

# Indicates equal contribution

*Correspondence to: [saleh@ru.ac.bd](mailto:saleh@ru.ac.bd)

Table S1: Compounds present in methanolic leaf extract *C. ternatea* as well as their CID. No. and docking score.

| S/N | Name of Compound | CID. No. | Docking score |
| --- | --- | --- | --- |
| 1 | Dodecanoic Acid, Methyl Ester | 8139 | -5.2 |
| 2 | 1,2-Benzenedicarboxylic Acid, Bis (2- Methylpropyl) Ester | 14478556 | -8.2 |
| 3 | 1,2-Benzenedicarboxylic Acid, Dibutyl Ester | 3026 | -5.6 |
| 4 | 1,2-Benzenedicarboxylic Acid, Bis(2- Methylpropyl) Ester | 6782 | -6.2 |
| 5 | 2-([(2-Ethylhexyl) Oxy] Carbonyl) Benzoic Acid | 20393 | -6.3 |
| 6 | 1-Penten-4-Yn-3-Ol, 1-Chloro-3-Ethyl | 5281077 | -4.3 |
| 7 | Phthalic Acid, 4-Cyanophenyl Nonyl Ester | 6423376 | -6.5 |
| 8 | 1,2-Benzenedicarboxylic Acid, Mono (2- Ethylhexyl) Ester | 6426665 | -6.1 |
| 9 | 1,2-Benzenedicarboxylic Acid, Dipentyl Ester | 8561 | -5.7 |
| 10 | 1,2-Benzenedicarboxylic Acid, Butyl Octyl Ester | 66540 | -5.5 |

Table S2:Compounds present in methanolic flower extract *C. ternatea* as well as their CID. No. and docking score.

| S/N | Name of Compound | CID. No. | Docking score |
| --- | --- | --- | --- |
| 1 | Glycerin | 753 | -4.1 |
| 2 | 2,4-Dihydroxy-2,5-dimethyl-3(2H)-furan-3-one | 538757 | -5.3 |
| 3 | 2-Hydroxy-gamma-butyrolactone | 545831 | -4.2 |
| 4 | Acetic acid, 1-(2-methyltetrazol-5-yl)ethenyl ester | 538650 | -5.0 |
| 5 | dl-Glyceraldehyde dimer | 533979 | -4.1 |
| 6 | Alpha-amino-gamma-butyrolactone | 73509 | -4.0 |
| 8 | 1,2,3-Propanetriol, monoacetate | 33510 | -4.3 |
| 9 | 1,2-Dioxolan-3-one, 5-ethyl-5-methyl-4- methylene | 536762 | -5.1 |
| 10 | 4-Ethylamino-n-butylamine | 7567962 | -3.7 |
| 12 | 2-Propenoic acid, tridecyl ester | 18316 | -4.9 |
| 13 | Neophytadiene | 10446 | -4.9 |
| 14 | n-Hexadecanoic acid | 985 | -5.1 |
| 15 | cis-Vaccenic acid | 5282761 | -5.4 |
